# Supplementary material
Source: publisher figshare collection journal article supplement (https://frontiersin.figshare.com/ndownloader/files/26613338)

**Supplementary Figure 1.** Immunofluorescent staining of allografts harvested from each group at POD 7.

(A) Immunofluorescent staining of CD3 (green), IFN- $\gamma$  (red), and 4',6-diamidino-2-phenylindole (DAPI, blue, nuclei) in grafts (scale bar = 100  $\mu$ m; original magnification:  $\times 400$ ). (B) Immunofluorescent staining of CD3 (green), cleaved-caspase-3 (red), and DAPI in grafts (scale bar = 100  $\mu$ m; original magnification:  $\times 400$ ). (C) Immunofluorescent staining of cleaved-caspase-3 (red), actinin (green), and DAPI in grafts (scale bar = 100  $\mu$ m; original magnification: 200 $\times$ ). (D) Immunofluorescent staining of cleaved-PARP (red), actinin (green), and DAPI in grafts (scale bar = 100  $\mu$ m; original magnification:  $\times 200$ ).

POD = post-operative day.

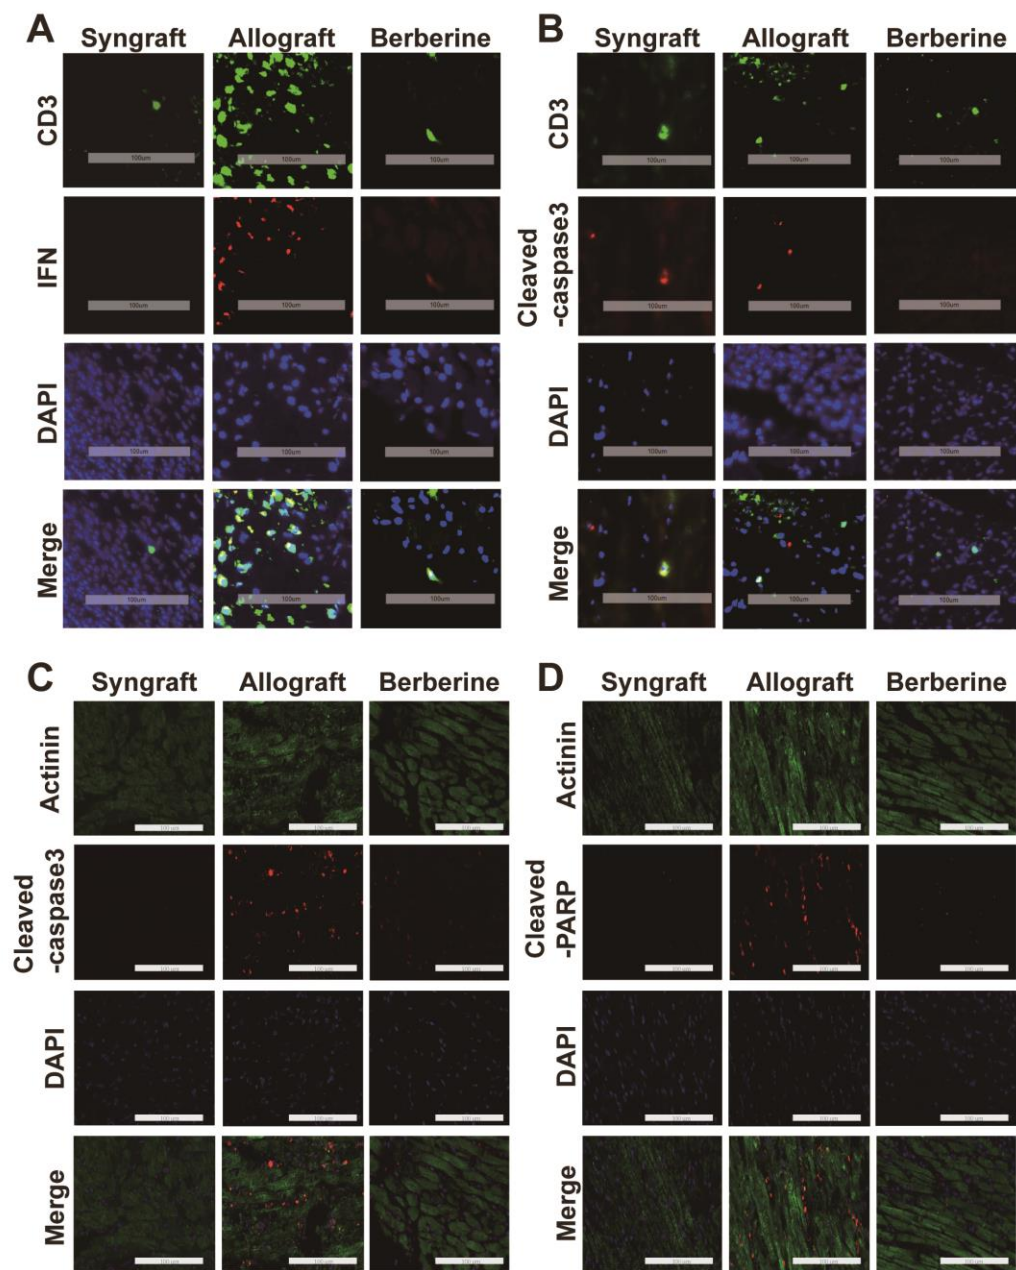

Supplement: Supplementary file [file 26613338]
